# Supplementary material
Source: PubMed Central journal article supplement (PMC3173515)
Supplement: NIHMS295929-supplement-Supp_Fig_S1.pdf [file NIHMS295929-supplement-Supp_Fig_S1.pdf]

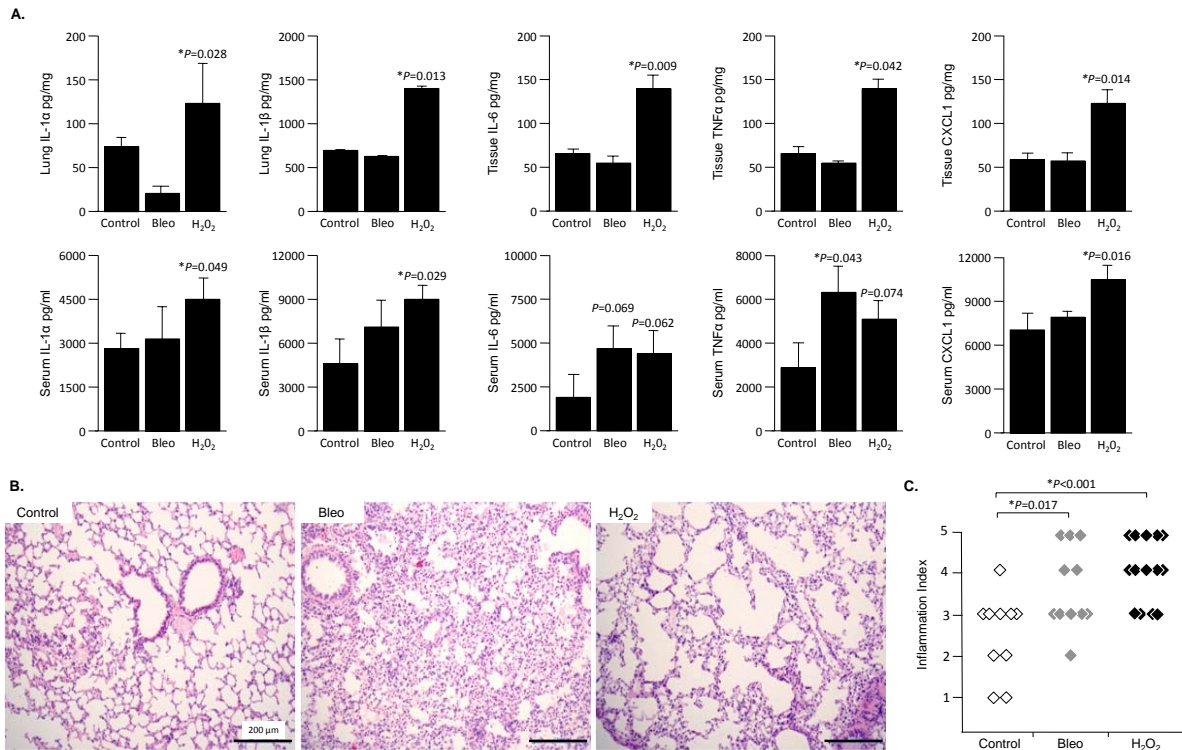

**Figure S1. Pro-inflammatory cytokine profile of young mice with induced genotoxic stress. A)** IL-1 $\alpha$ , IL-1 $\beta$ , IL-6, TNF $\alpha$ , and CXCL1 were measured in the lungs and sera of young mice ( $n=5$  per cohort) that had been intratracheally administered saline (Control), saline with bleomycin (Bleo) at 0.033 mg/kg body weight, or had their drinking water supplemented with 0.5% hydrogen peroxide for 3 weeks (H<sub>2</sub>O<sub>2</sub>). **B)** Representative H&E stained lung sections from mice. **C)** Scoring of lung inflammation in the same mice (1 is no pathology on histological cross-section, and 5 is extensive cellular infiltration, edema, and alveolar consolidation). In panels A and C asterisks denote a statistical significant difference ( $P<0.05$ ). Statistical analyses were performed using a two-tailed Student's  $t$ -test.
